# Supplementary material for: Effects of chondroitin sulfate proteoglycan 4 (NG2/CSPG4) on soft-tissue sarcoma growth depend on tumor developmental stage
Source: PubMed Central journal article supplement (PMC5818183; doi:10.1074/jbc.m117.805051), 2017-12-01
Supplement: 10.1074_M117.805051_jbc.M117.805051-1.pdf [file 10.1074_M117.805051_jbc.M117.805051-1.pdf]

## Supplementary data

### Supplemental Tables

#### Supplemental Table 1

Number of cells required to form a xenograft tumor from a human undifferentiated pleomorphic sarcoma infected with a construct expressing a lentivirus expressing an anti- NG2/CSPG4 construct or a control. Knockdown of NG2/CSPG4 does not increase the number of cells required to form a xenograft tumor.

|                           | Cell number injected | Tumors/Sites injected | Percentage |
|---------------------------|----------------------|-----------------------|------------|
| GFP-lentivirus            | $1 \times 10^5$      | 4/4                   | 100%       |
|                           | $1 \times 10^4$      | 6/6                   | 100%       |
|                           | $1 \times 10^3$      | 6/6                   | 100%       |
|                           | $1 \times 10^2$      | 4/4                   | 100%       |
| anti-NG2/CSPG4-lentivirus | $1 \times 10^5$      | 4/4                   | 100%       |
|                           | $1 \times 10^4$      | 6/6                   | 100%       |
|                           | $1 \times 10^3$      | 6/6                   | 100%       |
|                           | $1 \times 10^2$      | 4/4                   | 100%       |

#### Supplemental Table 2

Differential expression between tumors in which *Ng2/Cspg4* is depleted after a tumor has formed with those expressing *Ng2/Cspg4*. Statistically significant greater than twofold changes are shown from tumors that developed in *Kras*<sup>FRT-STOP-FRT-G12D/+</sup>; *p53*<sup>FRT/FRT</sup>; *Rosa26*<sup>+/+</sup>; *Ng2/Cspg4*<sup>ff</sup> mice compared to tumors from *Kras*<sup>FRT-STOP-FRT-G12D/+</sup>; *p53*<sup>FRT/FRT</sup>; *Rosa26*<sup>Cre-ER-T2/+</sup>; *Ng2/Cspg4*<sup>ff</sup> mice. The full data set is deposited in the GEO database (GEO: GSE97489).

**Gene Symbol****Fold regulation**

|          |         |
|----------|---------|
| Adm      | -7.9357 |
| Casp7    | 2.2036  |
| Ccl2     | -4.8336 |
| Cdc20    | 2.6256  |
| Cox5a    | 2.3761  |
| Dkc1     | 4.199   |
| E2f4     | 2.9902  |
| Ets2     | 2.6077  |
| Fgf2     | -2.6991 |
| Foxc2    | 2.3001  |
| Gadd45g  | 3.3183  |
| Gpd2     | 2.1287  |
| Hmox1    | -3.7693 |
| Igfbp3   | -2.4944 |
| Igfbp5   | 10.1147 |
| Igfbp7   | -3.7891 |
| Ldha     | -2.0909 |
| Lig4     | 2.3335  |
| Lpl      | -2.6735 |
| Mcm2     | 2.4923  |
| Pfkl     | -2.9899 |
| Pgf      | 44.0699 |
| Serpinb2 | -4.1965 |
| Serpinf1 | -3.9415 |
| Sirt1    | 2.6702  |
| Skp2     | 3.2384  |
| Stmn1    | 2.1397  |
| Terf2ip  | 2.2312  |
| Tnks2    | 2.0209  |
| Uqcrrs1  | 2.3196  |
| Vegfc    | 2.2911  |
| Xrcc4    | 2.3267  |
| Hsp90ab1 | 2.5509  |

### Supplemental Table 3

Differential expression between tumors in which *Ng2/Cspg4* is depleted at the time of tumor initiation with those expressing *Ng2/Cspg4*. Statistically significant greater than twofold changes are shown from tumors that developed in *Kras*<sup>G12D</sup>; *p53*<sup>ff</sup>; *Ng2/Cspg4*<sup>ff</sup> mice compared to tumors from *Kras*<sup>G12D</sup>; *p53*<sup>ff</sup>; *Ng2/Cspg4*<sup>+/+</sup> mice. The full data set is deposited in the GEO database (GEO: GSE97489).

#### Gene Symbol

#### Fold regulation

|         |         |
|---------|---------|
| Acs14   | -3.34   |
| Adm     | -16.20  |
| Angpt1  | 5.10    |
| Car9    | -2.24   |
| Casp7   | -3.12   |
| Casp9   | -2.98   |
| Ccl2    | -8.94   |
| Ccnd3   | -4.26   |
| Cdh2    | -2.49   |
| Cflar   | -2.80   |
| Ets2    | -2.28   |
| Fgf2    | -7.50   |
| Gadd45g | -9.00   |
| Gpd2    | -2.09   |
| Gsc     | -8.12   |
| Hmox1   | -5.85   |
| Igfbp3  | -358.35 |
| Igfbp5  | -233.07 |
| Igfbp7  | -16.31  |
| Kdr     | -3.26   |
| Lpl     | 3.95    |
| Map2k1  | -3.58   |
| Map2k3  | -3.33   |
| Nol3    | -19.98  |
| Pfk1    | -2.82   |

|          |        |
|----------|--------|
| Pgf      | -20.34 |
| Serpinb2 | -37.20 |
| Serpinf1 | -2.38  |
| Slc2a1   | -3.44  |
| Snail    | -2.68  |
| Tek      | -3.66  |
| Tep1     | -3.71  |
| Vegfc    | -11.95 |

#### Supplemental Table 4

Differential expression between tumors in which *Ng2/Cspg4* is depleted at tumor initiation with tumors in which *Ng2/Cspg4* is depleted after a tumor has formed. Statistically significant greater than twofold changes are shown from tumors that developed in from *Kras*<sup>G12D</sup>; *p53*<sup>ff</sup>; *Ng2/Cspg4*<sup>ff</sup> mice compared to tumors from *Kras*<sup>FRT-STOP-FRT-G12D/+</sup>; *p53*<sup>FRT/FRT</sup>; *Rosa26*<sup>Cre-ER-T2/+</sup>; *Ng2/Cspg4*<sup>ff</sup> mice. The full data set is deposited in the GEO database (GEO: GSE97489).

#### Gene Symbol

#### Fold regulation

|        |       |
|--------|-------|
| Acs14  | -3.86 |
| Angpt1 | 4.69  |
| Atp5a1 | -2.07 |
| Car9   | -4.15 |
| Casp7  | -7.19 |
| Casp9  | -2.40 |
| Ccl2   | -3.14 |
| Ccnd3  | -3.79 |
| Cdc20  | -2.15 |
| Cdh2   | -3.56 |
| Cflar  | -2.02 |
| Cox5a  | -2.60 |
| Cpt2   | -2.01 |
| Dsp    | 2.47  |
| E2f4   | -2.37 |

|          |         |
|----------|---------|
| Ercc3    | -2.18   |
| Ets2     | -2.70   |
| Fgf2     | -5.50   |
| Flt1     | 5.41    |
| Gadd45g  | -43.91  |
| Gpd2     | -2.44   |
| Gsc      | -3.04   |
| Hmox1    | -3.06   |
| Igfbp3   | -74.02  |
| Igfbp5   | -251.18 |
| Igfbp7   | -10.01  |
| Lig4     | -2.91   |
| Lpl      | 3.06    |
| Map2k1   | -2.81   |
| Map2k3   | -3.27   |
| Mcm2     | -2.35   |
| Nol3     | -48.83  |
| Pgf      | -337.10 |
| Serpinb2 | -17.75  |
| Sirt1    | -3.68   |
| Sirt2    | -2.03   |
| Slc2a1   | -3.01   |
| Stmn1    | -2.91   |
| Terf2ip  | -3.64   |
| Vegfc    | -13.12  |
| Weel     | -2.09   |
| Xrcc4    | -2.56   |
| Actb     | -2.82   |
| Hsp90ab1 | -2.32   |

## Supplementary figures and legends

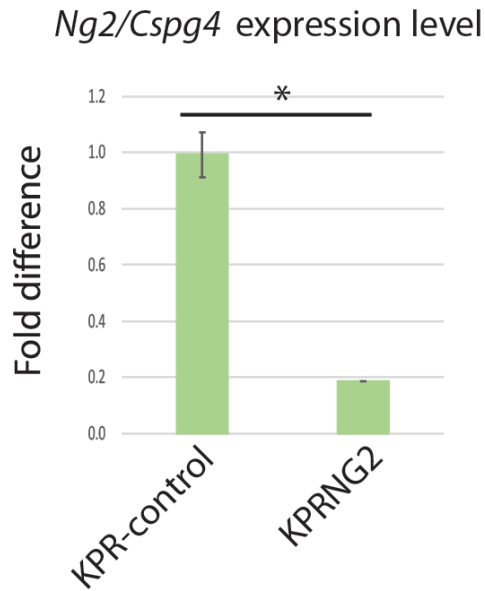

## Supplemental Figure One

**Supplemental Figure 1:** Level of *Ng2/Cspg4* expression in tumors generated from *Kras*<sup>FRT-STOP-FRT-G12D/+</sup>; *p53*<sup>FRT/FRT</sup>; *Rosa26*<sup>Cre-ER-T2/+</sup>; *Ng2/Cspg4*<sup>+/+</sup> (KPR-control) mice or *Kras*<sup>FRT-STOP-FRT-G12D/+</sup>; *p53*<sup>FRT/FRT</sup>; *Rosa26*<sup>Cre-ER-T2/+</sup>; *Ng2/Cspg4*<sup>fl/fl</sup> (KPRNG2) mice.

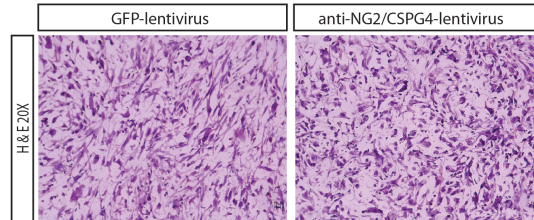

Supplemental Figure Two

**Supplemental Figure 2:** Histology of tumors that formed from human undifferentiated pleomorphic sarcoma cells established as xenografts infected with anti-NG2/CSPG4 construct or control. No significant difference is observed in cytology between control and NG2/CSPG4 knockdown.

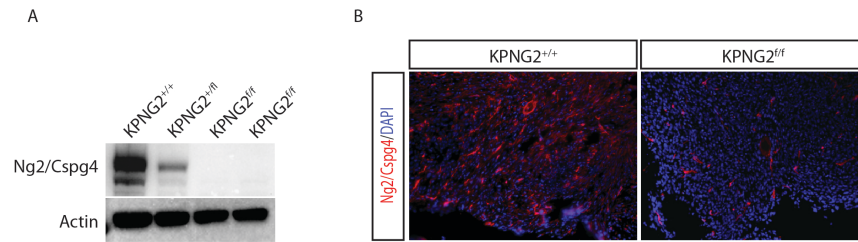

Supplemental Figure Three

**Supplemental Figure 3:** Deletion efficiency for NG2/CSPG4 protein was confirmed by Western blot analysis (Panel A) , and Immunofluorescence staining (panel B) for tumors from *Kras*<sup>G12D</sup>; *p53*<sup>fl/fl</sup>; *Ng2/Cspg4*<sup>fl/fl</sup> (*KPNG2*<sup>fl/fl</sup>) mice.
